# Supplementary material
Source: PubMed Central journal article supplement (PMC4815098)
Supplement: supp_tpc.15.00546_TPC2015-00546-RAR1_Supplemental_Data.pdf [file supp_tpc.15.00546_TPC2015-00546-RAR1_Supplemental_Data.pdf]

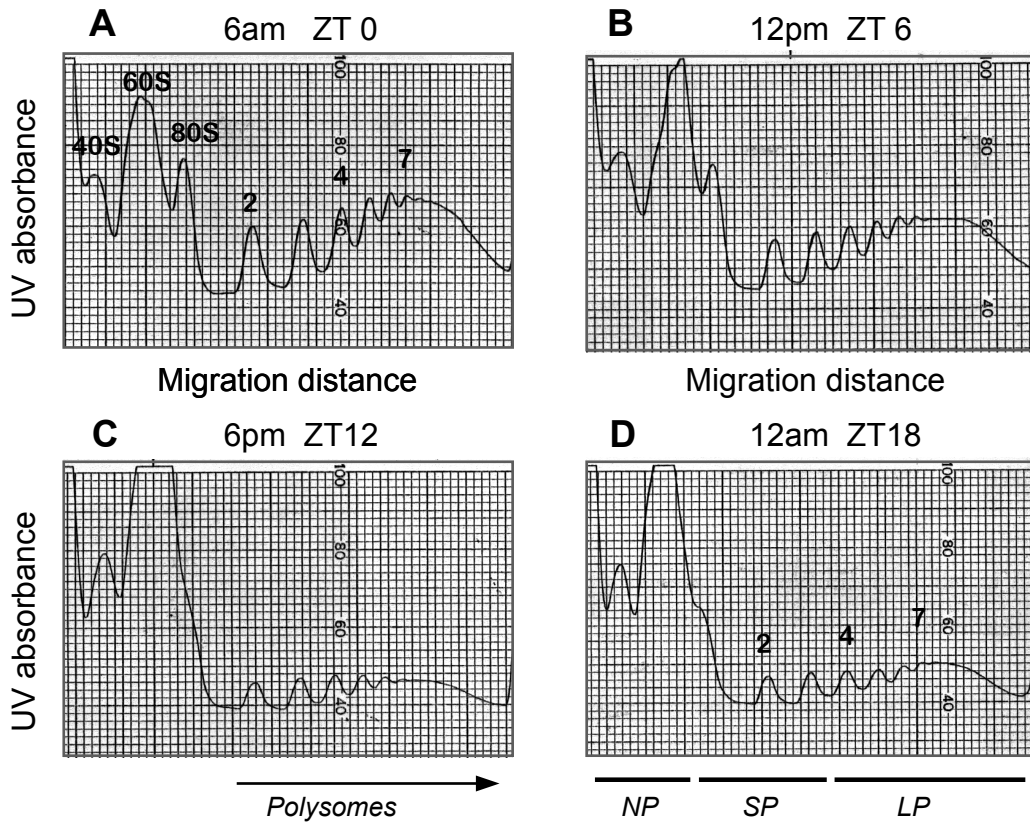

Supplemental Figure 1

Representative polysome gradient UV absorption profiles. Each panel is a scanned trace of pen on graph paper, showing that the fractionation worked as well as reasonably expected. The positions of the 40S, 60S, and 80S ribosome (monosome) are indicated. Peaks with 2, 4, and 7 ribosomes per mRNA are also identified. The regions of the gradient that were pooled into (NP) non-polysomal mRNA, (SP) small polysomes averaging 2 ribosomes per mRNA, and (LP) large polysomes averaging 7 ribosomes per mRNA are indicated in (D). Overall ribosome loading cannot be quantified from these charts because of underlying pigments that contribute to the UV absorption. Ribosome loading for Figure 1 was quantified from UV absorption at 260nm after purifying the RNA from the gradients.

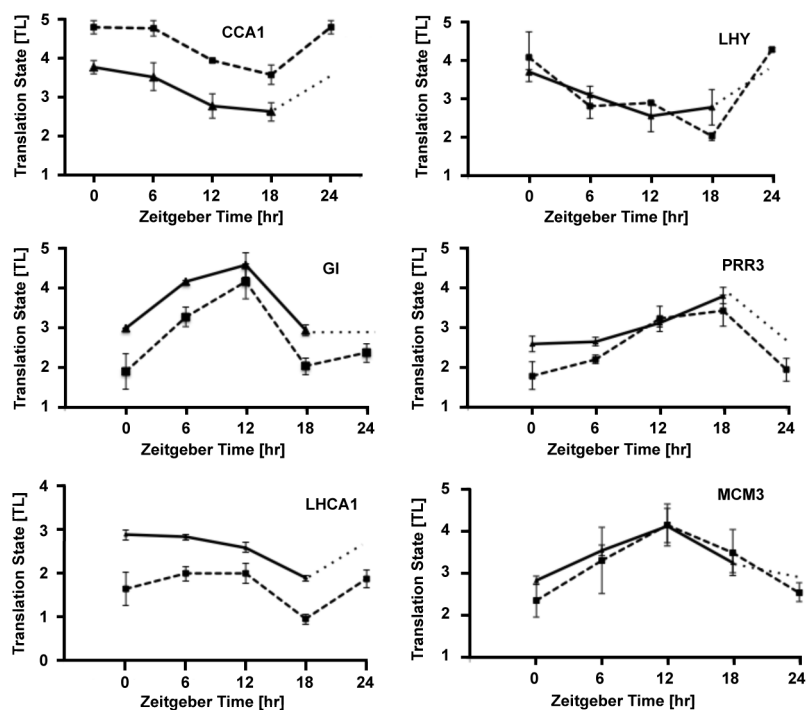

### Supplemental Figure 2

Microarray data of mRNA translation state are reproducible by quantitative real-time PCR. The RNA samples from polysome fractionations that were used for the microarray analysis of mRNA translation state were examined independently by qRT-PCR. Solid line: array data. Broken line: qRT-PCR. For qRT-PCR a fifth time point was collected after 24h (ZT24) to confirm that TL values will approach the original TL value at ZT0, thus closing the diurnal cycle. Dotted line: For the array data the ZT0 datapoint was plotted again at ZT24. Error bars show standard deviations from three replications.

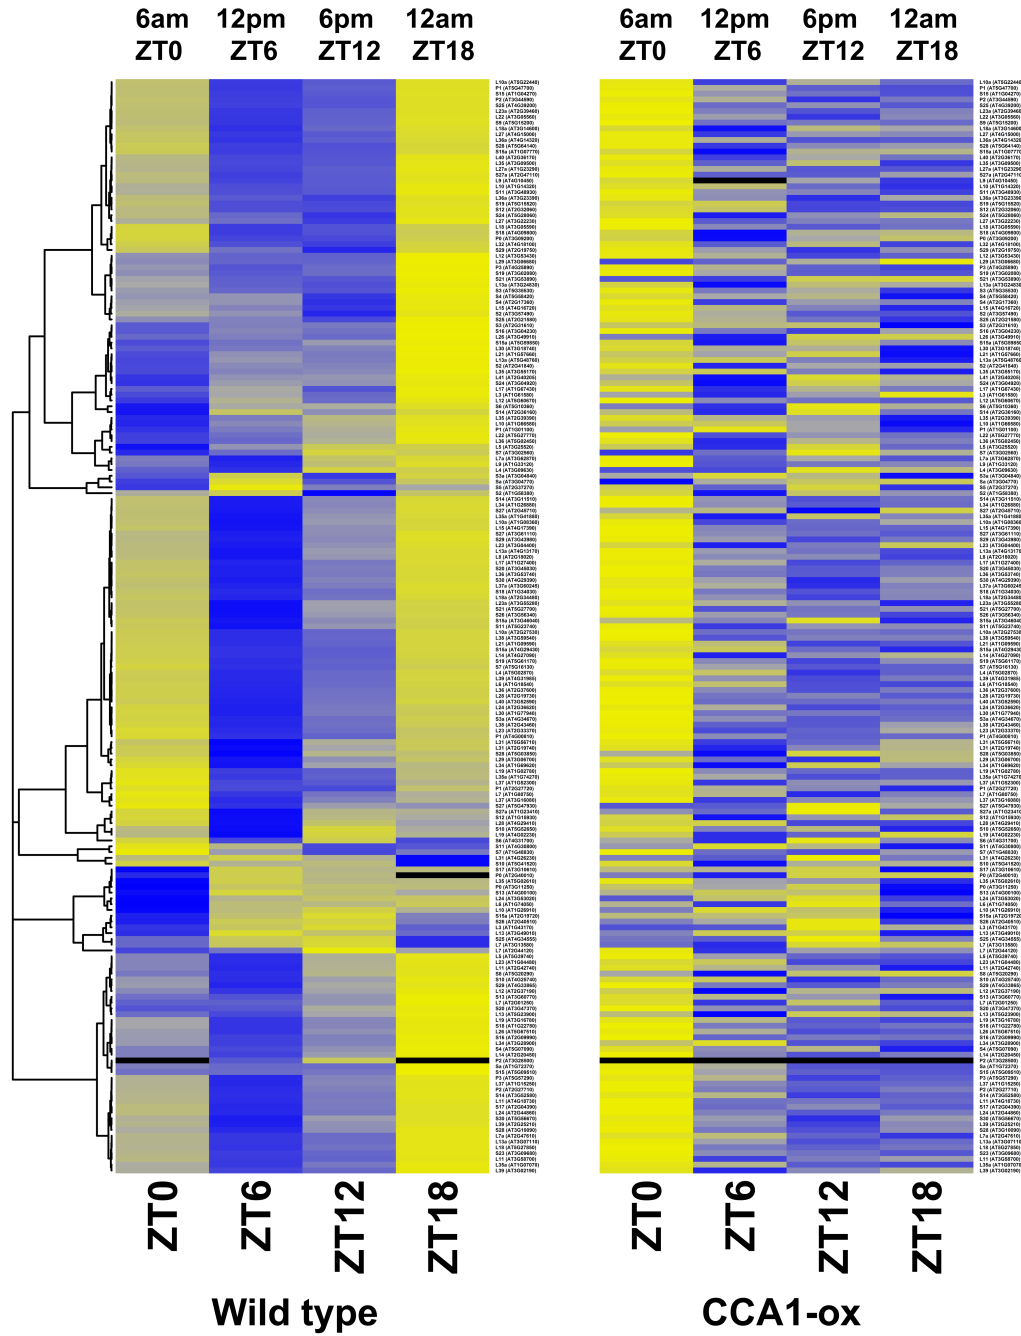

Supplemental Figure 3. Heatmap of translation states for 189 cytosolic ribosomal protein mRNAs. mRNAs (Barakat et al., 2001; Browning and Bailey-Serres, 2015) were matched to probeset IDs (228 out of the 249 genes). Of these, 189 genes passed a criterion for sufficient and reliable gene expression for at least two time points in wild type. Wild-type ribosome loading data were averaged from three replicates and then clustered hierarchically using their Pearson correlation coefficient, resulting in the dendrogram on the left. The equivalent data for CCA1-ox were not clustered and are displayed in the same gene order as for wild type. For display, the ribosome loading of each gene was z-score transformed, where  $z=+1$  (yellow) indicates a translation state one standard deviation above the mean translation state of the gene. Positive and negative z-scores are yellow and blue respectively. The light period lasts from ZT0 to ZT16. Datapoints with insufficient data, such as low mRNA level, are masked in black. Protein names are readable in the high-resolution version of the figure.

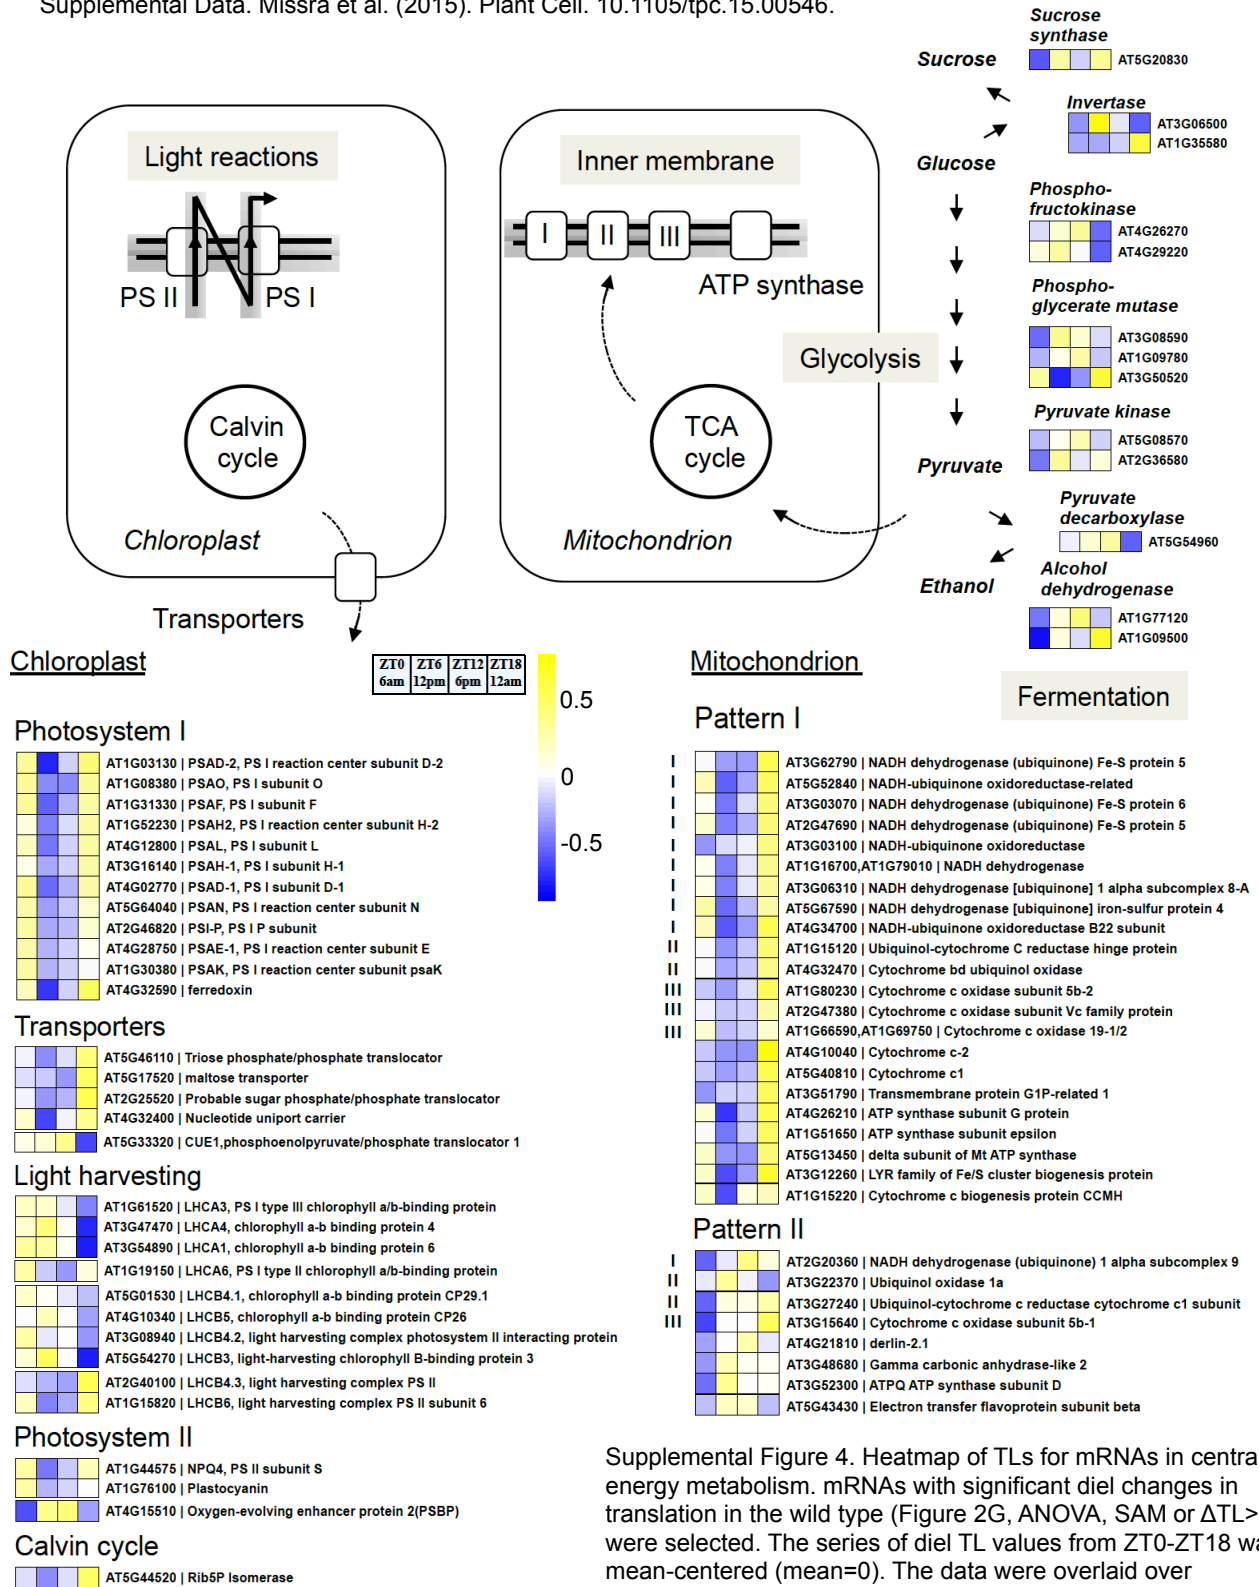

Supplemental Figure 4. Heatmap of TLs for mRNAs in central energy metabolism. mRNAs with significant diel changes in translation in the wild type (Figure 2G, ANOVA, SAM or  $\Delta TL > 0.7$ ) were selected. The series of diel TL values from ZT0-ZT18 was mean-centered (mean=0). The data were overlaid over Arabidopsis gene ontology groups using the pathway visualization tool MAPMAN (Thimm et al., 2004). Displayed here are mRNAs involved in energy metabolism in the chloroplast,

the mitochondrion, and glycolysis. mRNAs without significant translation cycles are omitted. For example, the ribosome loading of the following glycolytic enzymes was flat: Hexokinase (2 genes), phosphoglucose-isomerase (2 genes), phosphofruktokinase (4 other genes), aldolase (7 genes), pyruvate dehydrogenase (3 genes). The tricarboxylic acid cycle also revealed no significant TL cycles. Heatmaps were grouped such that mRNAs with exceptional TL profiles are set apart from the rest.



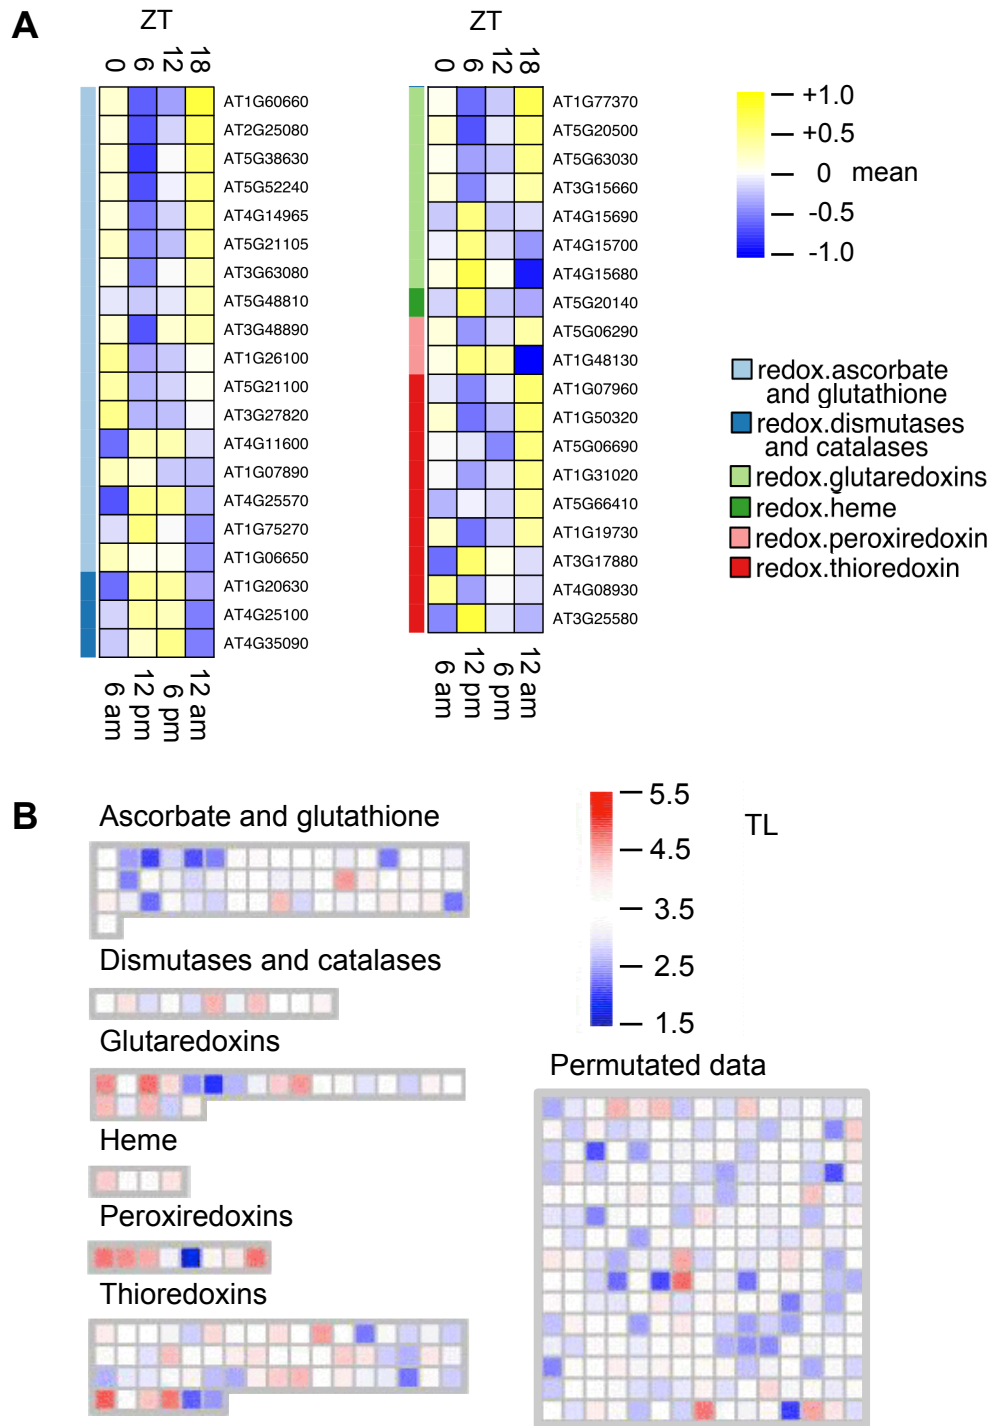

Supplemental Figure 5. Translation states of redox-related mRNAs. (A) Diel cycles of relative translation states. Only mRNAs with significant diel cycles are included in this panel. The TL values were centered on the mean of each time course (mean = 0) for better comparability. Yellow indicates elevated TL and blue is depressed TL. (B) Absolute translation states (TL) of mRNAs were visualized with MAPMAN (Thimm et al., 2004). Each square represents one gene. The data are from the ZT6 (12pm) time point. Except for the ascorbate/glutathione group, the redox mRNAs have relatively high translation states. The panel entitled 'Permutated data' shows a random sampling of translation states from the entire genome.

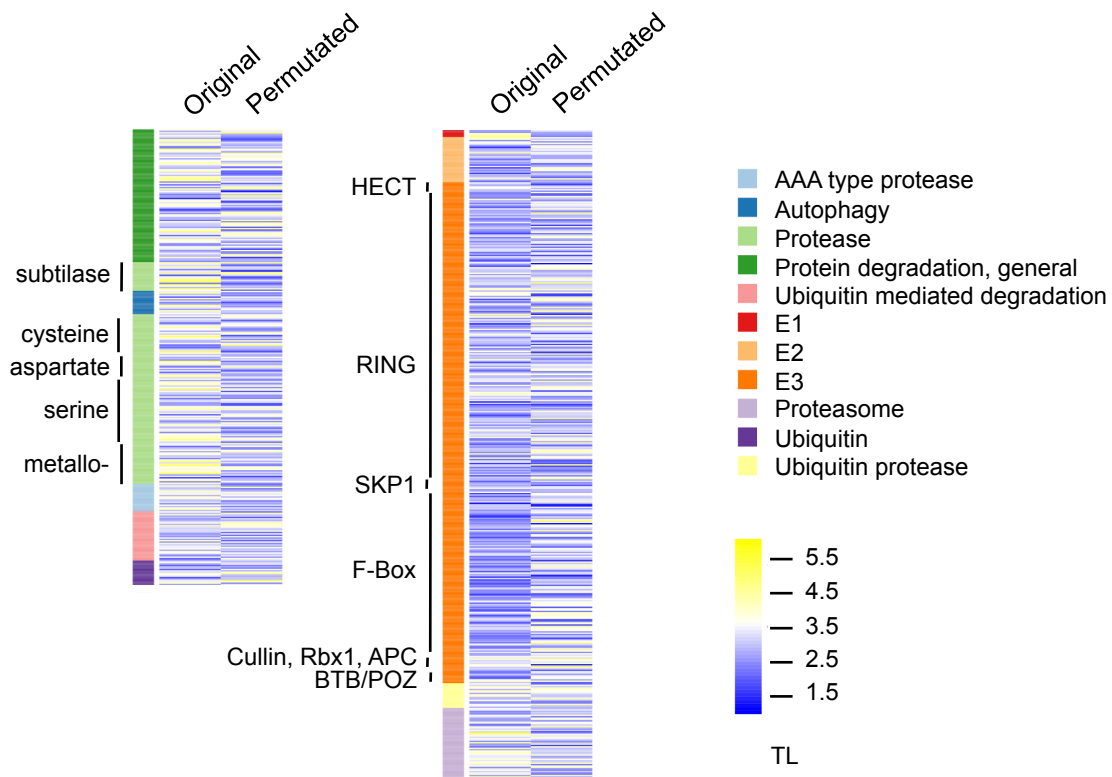

Supplemental Figure 6. Translation states of mRNAs related to protein turnover. The heatmap illustrates the absolute translation states (TL) of mRNAs in various subgroups of the MAPMAN gene ontology term, protein turnover. Each row represents one gene. The actual TL of the gene is plotted in the column labeled 'original'. The column labeled 'permutated' shows the distribution of TL values after randomization. The data are from the ZT6 (12pm) time point. Proteases and including 26S proteasome subunits tend to have notably higher translation states than mRNAs for E3 ubiquitin ligases.

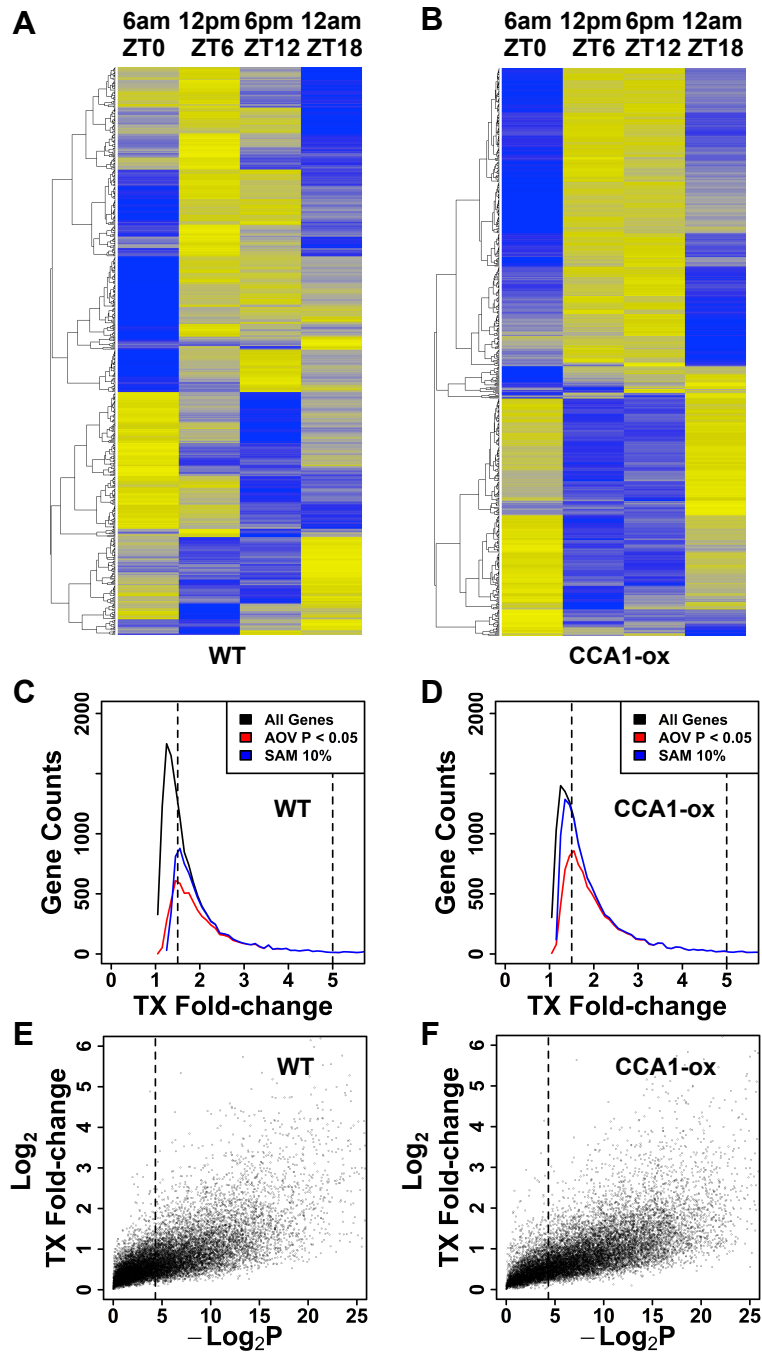

Supplemental Figure 7.

Diel transcript levels in wild type and CCA1-ox. Heat map of total mRNA levels obtained under long day conditions at 6am (ZT0), 12pm (ZT6), 6pm (ZT12), and 12am (ZT18). Data are averages from three biological replicates. Only mRNAs with a fold-change higher than 5-fold are included. (A) WT, 615 genes, (B) CCA1-ox. Transcript levels are displayed after z-score transformation (yellow=high). The clustering tree on the left reveals how, in CCA1-ox, most mRNAs fall into two large clusters that correlate with light (12pm and 6pm) and darkness (6am and 12am). In contrast, in wild type, transcript levels fall into four major clusters that were less prone to reflect the light environment. Panels (C) and (D) show a line histogram of transcript fold changes for the entire dataset (13,625 genes) similar to Figure 2C and D. Panels (E) and (F) show the relation between ANOVA p-value (AOV) and fold-change in transcript level for 14,218 genes (volcano plots). The stippled line represents  $p=0.05$ .

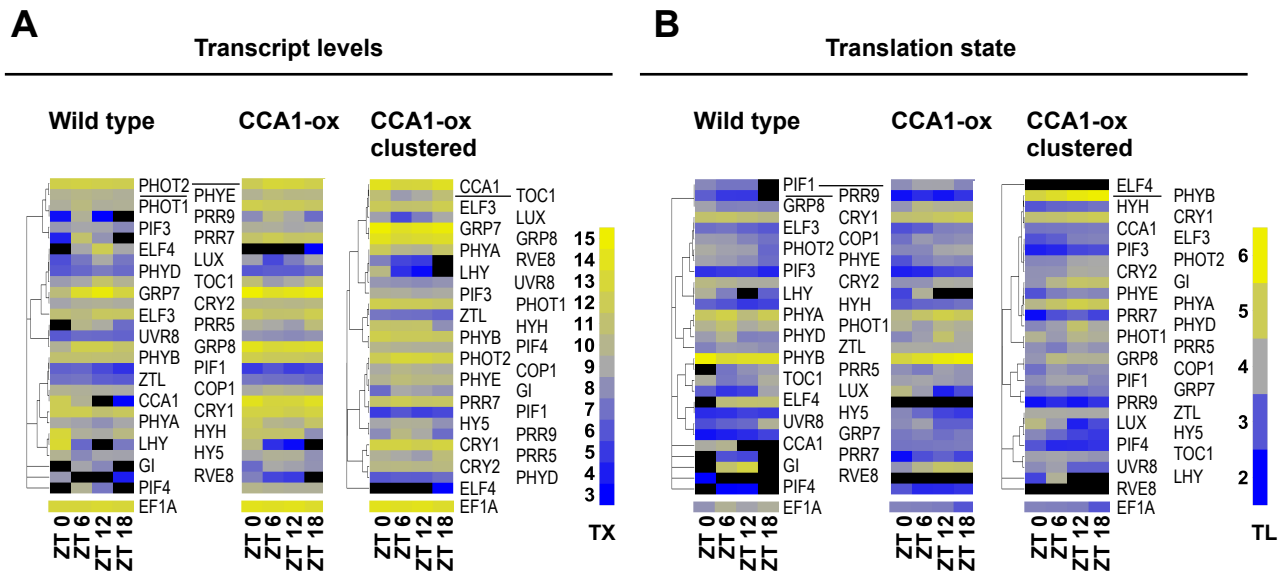

Supplemental Figure 8. Diel cycles of translation states and mRNA transcript levels for clock-associated genes.

(A) Transcript abundance, averaged over three replicates. Abundance values are log<sub>2</sub>-transformed expression signals (yellow=high). Black indicates that the gene did not pass our pre-filter for that time point. Previously described clock-regulated genes were hand-selected, focusing on the central oscillator, the light input pathways, and selected outputs. EF1A was included for comparison as a weakly cycling mRNA. (Left) WT. Genes were clustered using hierarchical clustering based on Pearson coefficients, with replicates averaged. (Middle) Data from CCA1-ox were displayed as for WT, and the genes are ordered according to the WT clustering tree. Gene names are printed between left and middle panels and apply to both panels. (Right) CCA1-ox data were re-clustered on their own; gene names are printed on the right.

(B) Translation patterns of clock-associated genes are displayed as in panel A. Translation states (TL) were calculated as described in Methods, where TL = 3 corresponds to an estimated average of three ribosomes per mRNA.

| Transcript peak – CCA1-ox   |           |         |            |              |            | Transcript peak – CCA1-ox    |           |         |            |              |            |                              |           |         |            |              |            |                             |           |         |            |              |            |
|-----------------------------|-----------|---------|------------|--------------|------------|------------------------------|-----------|---------|------------|--------------|------------|------------------------------|-----------|---------|------------|--------------|------------|-----------------------------|-----------|---------|------------|--------------|------------|
| 6 am ZT 0                   |           |         |            |              |            | 12 pm ZT 6                   |           |         |            |              |            | 6 pm ZT 12                   |           |         |            |              |            | 12 am ZT 18                 |           |         |            |              |            |
| Cellular Component          | Annotated | Present | Enrichment | FDR          | WT         | Cellular Component           | Annotated | Present | Enrichment | FDR          | WT         | Cellular Component           | Annotated | Present | Enrichment | FDR          | WT         | Cellular Component          | Annotated | Present | Enrichment | FDR          | WT         |
| Nucleus                     | 4967      | 1589    | 1.1        | <u>1E-14</u> | 1.1        | Chloroplast                  | 2774      | 865     | 1.5        | <u>1E-42</u> | <b>1.0</b> | Chloroplast                  | 2774      | 701     | 1.5        | <u>2E-35</u> | 1.5        | Nucleus                     | 4967      | 1198    | 1.2        | <u>2E-10</u> | 0.9        |
| Mediator complex            | 23        | 10      | 1.6        |              | 1.3        | Stroma                       | 606       | 220     | 1.7        | <u>1E-18</u> | <b>1.0</b> | Stroma                       | 588       | 222     | 2.2        | <u>2E-33</u> | 1.8        | Plasma membrane             | 2110      | 539     | 1.2        | <u>1E-06</u> | 1.6        |
| Spliceosome complex         | 11        | 7       | 2.3        |              | 2.1        | Nucleoid                     | 27        | 18      | 3.1        | <u>7E-06</u> | <b>1.0</b> | Cip protease                 | 8         | 3       | 2.2        |              | <b>1.0</b> | Cell wall                   | 174       | 50      | 1.4        |              | <b>2.2</b> |
| Nucleolus                   | 244       | 123     | 1.8        | <u>4E-12</u> | 1.5        | Plastoglobule                | 58        | 24      | 2.0        | <u>5E-03</u> | 2.5        | Plastoglobule                | 58        | 20      | 2.0        | <u>7E-03</u> | <b>0.3</b> | Golgi apparatus             | 673       | 152     | 1.1        |              | 1.5        |
| Ribonucleoprotein           | 403       | 179     | 1.6        | <u>5E-11</u> | 1.2        | Plastid envelope             | 534       | 195     | 1.7        | <u>4E-15</u> | 1.2        | Plastid envelope             | 534       | 180     | 2.0        | <u>1E-20</u> | 1.5        | <b>Biological Process</b>   |           |         |            |              |            |
| Cytosolic ribosome          | 228       | 108     | 1.7        | <u>5E-09</u> | 1.3        | Thylakoid                    | 378       | 141     | 1.8        | <u>9E-12</u> | 1.6        | Thylakoid                    | 378       | 140     | 2.2        | <u>4E-20</u> | <b>1.2</b> | Cellulose metabolism        | 130       | 34      | 1.3        |              | <b>2.1</b> |
| Cullin-Ring E3 ligase       | 122       | 51      | 1.5        | <u>5E-03</u> | 1.4        | Membrane                     | 281       | 106     | 1.8        | <u>3E-09</u> | 1.7        | Membrane                     | 283       | 107     | 2.2        | <u>3E-16</u> | <b>1.1</b> | Pectin metabolism           | 47        | 14      | 1.4        |              | <b>3.6</b> |
| <b>Biological Process</b>   |           |         |            |              |            | Photosystem                  | 63        | 23      | 1.7        | <u>4E-02</u> | 2.2        | O <sub>2</sub> evolving cx.  | 19        | 9       | 2.8        | <u>2E-02</u> | <b>1.2</b> | Cell wall organization      | 353       | 80      | 1.1        |              | <b>1.8</b> |
| RNA-biology                 |           |         |            |              |            | PS II                        | 42        | 12      | 1.3        |              | <b>2.0</b> | Lumen                        | 68        | 33      | 2.9        | <u>2E-08</u> | <b>1.3</b> | Cell wall loosening         | 18        | 2       | 0.5        |              | <b>4.4</b> |
| Translation                 | 459       | 186     | 1.5        | <u>5E-08</u> | 1.1        | React. center                | 12        | 1       | 0          |              | 0          | Mitochondrial part           | 229       | 47      | 1.2        |              | 1.1        | (An)ion transport           | 385       | 117     | 1.5        | <u>2E-04</u> | 2.1        |
| RNA methylation             | 171       | 115     | 2.4        | <u>3E-24</u> | <b>1.1</b> | PS I                         | 21        | 11      | 2.5        | <u>2E-02</u> | 2.6        | Cytosolic ribosome           | 228       | 67      | 1.7        | <u>2E-05</u> | <b>1.0</b> | Inorganic                   | 179       | 72      | 1.9        | <u>3E-07</u> | 2.7        |
| rRNA processing             | 253       | 62      | 0.9        |              | 1.1        | React. center                | 11        | 6       | 2.6        | <u>1E-02</u> | 3.0        | Vacuole                      | 654       | 139     | 1.3        | <u>1E-02</u> | 1.3        | Nitrate                     | 122       | 49      | 1.9        | <u>3E-05</u> | 2.6        |
| Cleavage                    | 18        | 14      | 2.8        | <u>3E-04</u> | 2.2        | Chromosome                   | 144       | 52      | 1.7        | <u>3E-04</u> | 1.5        | Apoplast                     | 247       | 89      | 2.1        | <u>4E-12</u> | 1.6        | Ammonium                    | 25        | 13      | 2.5        | <u>1E-02</u> | <b>3.9</b> |
| RNA splicing                | 88        | 52      | 2.1        | <u>3E-08</u> | 1.9        | Nucleosome                   | 43        | 22      | 2.4        | <u>2E-04</u> | <b>1.4</b> | Chromosome                   | 144       | 26      | 1.1        |              | <b>1.9</b> | Transition metal            | 104       | 34      | 1.6        |              | 1.2        |
| mRNA catabolism             | 102       | 48      | 1.7        | <u>5E-04</u> | 1.5        | <b>Biological process</b>    |           |         |            |              |            | <b>Biological Process</b>    |           |         |            |              |            | Amino acid import           | 60        | 26      | 2.1        | <u>2E-03</u> | 2.8        |
| mRNA transport              | 60        | 39      | 2.3        | <u>7E-08</u> | 2.7        | Photosynthesis               | 400       | 150     | 1.8        | <u>2E-12</u> | 1.4        | PS, light reaction           | 309       | 107     | 2.0        | <u>4E-12</u> | <b>1.0</b> | Amine metabolism            | 182       | 43      | 1.1        |              | <b>1.7</b> |
| Protein local. to organelle | 491       | 238     | 1.7        | <u>1E-22</u> | 1.8        | Light reaction               | 309       | 122     | 1.9        | <u>8E-12</u> | 1.5        | PS II assembly               | 170       | 62      | 2.1        | <u>4E-08</u> | <b>0.9</b> | Glucosinolate biosynthesis  | 161       | 15      | 0.5        |              | <b>0.9</b> |
| Mitochondrion               | 98        | 60      | 2.2        | <u>3E-10</u> | 2.3        | PS II light harvesting       | 27        | 18      | 3.2        | <u>2E-05</u> | <b>1.0</b> | NADP metabolism              | 198       | 62      | 1.7        | <u>2E-20</u> | 1.5        | Reg. of defense response    | 434       | 144     | 1.6        | <u>1E-07</u> | 2.0        |
| Nucleocytoplasm             | 177       | 100     | 2.0        | <u>1E-15</u> | 1.6        | NADP metabolism              | 198       | 66      | 1.6        | <u>8E-04</u> | 1.4        | NADP metabolism              | 198       | 94      | 1.7        | <u>2E-20</u> | 1.5        | Response to chitin          | 277       | 104     | 1.8        | <u>2E-08</u> | 2.1        |
| Peroxisome                  | 95        | 59      | 2.2        | <u>2E-10</u> | 2.2        | Glyceraldehyde-3-P metab.    | 227       | 95      | 2.0        | <u>6E-11</u> | <b>1.3</b> | Glucose catabolism           | 455       | 165     | 2.1        | <u>2E-20</u> | <b>1.4</b> | "- to salicylic acid        | 337       | 102     | 1.5        | <u>6E-04</u> | 1.7        |
| Vesicle mediated            | 484       | 229     | 1.7        | <u>3E-18</u> | <b>1.0</b> | Disaccharide metabolism      | 188       | 87      | 2.2        | <u>9E-13</u> | 1.5        | Pentose-P shunt              | 195       | 94      | 2.8        | <u>2E-20</u> | <b>1.5</b> | Cell death                  | 395       | 132     | 1.6        | <u>3E-07</u> | 2.0        |
| Photoperiodism              | 148       | 94      | 2.3        | <u>2E-17</u> | 3.3        | Oligosaccharide metab.       | 208       | 89      | 2.0        | <u>7E-11</u> | 1.5        | Polysaccharide synthesis     | 428       | 113     | 1.5        | <u>2E-05</u> | 1.8        | Respiratory burst           | 80        | 34      | 2.1        | <u>3E-04</u> | 2.9        |
| Long-day                    | 19        | 11      | 2.1        |              | 2.4        | Starch metabolism            | 216       | 100     | 2.2        | <u>1E-16</u> | 1.6        | Starch                       | 182       | 80      | 2.5        | <u>2E-15</u> | 3.2        | Response to darkness        | 29        | 13      | 2.2        |              | 2.4        |
| Reg. circadian rhythm       | 37        | 22      | 2.1        | <u>1E-05</u> | <b>1.4</b> | Pentose-P shunt              | 195       | 66      | 1.6        | <u>5E-04</u> | 1.4        | Amino acid biosynthesis      | 512       | 148     | 1.7        | <u>9E-10</u> | 1.5        | Response to hypoxia         | 40        | 16      | 1.9        |              | 1.8        |
| Glucosinolate biosynthesis  | 161       | 11      | 0.2        |              | 0.3        | Plastid transcription        | 73        | 37      | 2.4        | <u>9E-07</u> | <b>1.0</b> | Cysteine                     | 207       | 79      | 2.2        | <u>2E-11</u> | <b>1.2</b> | "- to unfolded protein      | 139       | 58      | 2.0        | <u>1E-06</u> | 2.1        |
| Phosphatidylinositol bios.  | 99        | 50      | 1.8        | <u>3E-05</u> | <b>0.8</b> | Amino acid biosynthesis      | 512       | 143     | 1.3        | <u>2E-03</u> | 1.1        | Peptidyl-Cys-S-nitrosylation | 15        | 12      | 4.6        | <u>4E-06</u> | <b>1.0</b> | Cell division               | 446       | 89      | 1.0        |              | <b>0.4</b> |
| Fatty acid catabolism       | 188       | 92      | 1.8        | <u>2E-08</u> | 1.5        | Pigment metabolism           | 305       | 148     | 2.3        | <u>1E-26</u> | 1.6        | Chlorophyll biosynthesis     | 121       | 46      | 2.2        | <u>1E-08</u> | <b>0.9</b> | Cytokinesis                 | 201       | 36      | 0.9        |              | <b>0.2</b> |
| Cell division               | 446       | 101     | 0.8        |              | 0.7        | Chlorophyll                  | 184       | 85      | 2.2        | <u>2E-12</u> | 2.1        | Glucosinolate biosynthesis   | 161       | 79      | 2.8        | <u>2E-18</u> | 2.3        |                             |           |         |            |              |            |
| Cytokinesis                 | 201       | 26      | 0.5        |              | <b>0.3</b> | Isoprenoid biosynth.         | 381       | 153     | 1.9        | <u>1E-15</u> | 1.3        | rRNA processing              | 253       | 77      | 1.8        | <u>4E-06</u> | <b>1.1</b> |                             |           |         |            |              |            |
|                             |           |         |            |              |            | Carotenoids                  | 105       | 64      | 2.9        | <u>2E-16</u> | <b>1.3</b> | Response to metal ion        | 471       | 140     | 1.7        | <u>4E-10</u> | 1.5        |                             |           |         |            |              |            |
|                             |           |         |            |              |            | Flavonoids                   | 185       | 66      | 1.7        | <u>1E-04</u> | 1.5        |                              |           |         |            |              |            | DNA replication             | 190       | 61      | 1.9        | <u>8E-06</u> | 2.4        |
|                             |           |         |            |              |            | Glucosinolate biosynthesis   | 161       | 43      | 1.3        |              | 1.8        |                              |           |         |            |              |            | Pyrimidine nucleotide bios. | 139       | 23      | 1.0        |              | <b>3.0</b> |
|                             |           |         |            |              |            | rRNA processing              | 253       | 83      | 1.6        | <u>2E-04</u> | <b>0.9</b> |                              |           |         |            |              |            | Cell division               | 446       | 89      | 1.2        |              | 0.9        |
|                             |           |         |            |              |            | Response to red light        | 86        | 36      | 2.0        | <u>3E-04</u> | 1.7        |                              |           |         |            |              |            | Cytokinesis                 | 201       | 62      | 1.8        | <u>3E-05</u> | 1.3        |
|                             |           |         |            |              |            | Inositol phosphate biosynth. | 61        | 45      | 3.5        | <u>4E-16</u> | <b>2.1</b> |                              |           |         |            |              |            |                             |           |         |            |              |            |
|                             |           |         |            |              |            | Cell division                | 446       | 103     | 1.1        |              | 1.4        |                              |           |         |            |              |            |                             |           |         |            |              |            |
|                             |           |         |            |              |            | Cytokinesis                  | 201       | 52      | 1.2        |              | <b>2.2</b> |                              |           |         |            |              |            |                             |           |         |            |              |            |

Supplemental Figure 9.

Gene ontology analysis of diurnal transcript levels in the CCA1-ox strain. Diurnal transcript levels were filtered for a difference between peak and trough using SAM with a 10% FDR without a fold-change cutoff. Groups of mRNAs with peaks at the given times were examined for enrichment of functional annotation categories using TOPGO. mRNAs lacking a peak were also tested for GO enrichment but did not return significant biases. The total number of genes in this dataset that falls under a given GO term is given as 'Annotated', the number that has a transcript peak at the given time is given as 'Present', along with the fold-overrepresentation (Enrichment) of this class in the CCA1-ox. FDR indicates the likelihood of false discovery. For comparison, the enrichment factor for each term in WT is also shown. If the enrichment factor in CCA1-ox is more than 1.5 fold higher than in wild type, the WT enrichment value is printed bold red; if the wild-type enrichment is 1.5 fold higher, then the WT enrichment value is underlined and green.

Supplemental Data. Missra et al. (2015). Plant Cell. 10.1105/tpc.15.00546

Translation peak – CCA1-ox

| 6 am ZT 0                    |                 | Annotated | Present | Enrichment | FDR   |
|------------------------------|-----------------|-----------|---------|------------|-------|
| Cellular Component           |                 |           |         |            |       |
| Chloroplast                  |                 | 2494      | 516     | 1.1        | 4E-02 |
| └ Thylakoid                  |                 | 407       | 127     | 1.6        | 2E-08 |
| └ Membrane                   |                 | 271       | 97      | 1.9        | 9E-10 |
| └ Photosystem                |                 | 42        | 27      | 3.4        | 3E-09 |
| └ PS II                      |                 | 27        | 13      | 2.5        | 4E-03 |
| └ React. center              | plastid encoded |           |         |            |       |
| └ PS I                       |                 | 15        | 14      | 4.9        | 1E-08 |
| └ React. center              |                 | 8         | 8       | 5.3        | 2E-05 |
| └ b6f complex                | plastid encoded |           |         |            |       |
| └ Lumen                      |                 | 65        | 19      | 1.5        |       |
| Ribonucleoprotein            |                 | 375       | 157     | 2.2        | 3E-23 |
| └ Ribosome                   |                 | 307       | 139     | 2.4        | 4E-24 |
| └ Cytosolic ribosome         |                 | 223       | 110     | 2.6        | 5E-23 |
| └ Large subunit              |                 | 90        | 57      | 3.3        | 1E-18 |
| └ Small subunit              |                 | 72        | 32      | 2.3        | 7E-06 |
| └ Plastid ribosome           |                 | 5         | 0       | 0          |       |
| └ snRNP                      |                 | 26        | 10      | 2.0        | 8E-02 |
| Nucleolus                    |                 | 237       | 60      | 1.3        | 5E-02 |
| Prefoldin complex            |                 | 9         | 7       | 4.1        | 2E-03 |
| Mitochondrion                |                 | 1349      | 274     | 1.1        |       |
| └ Mito. inner membrane       |                 | 151       | 44      | 1.5        | 1E-02 |
| └ Respiratory chain          |                 | 69        | 28      | 2.1        | 2E-04 |
| └ Complex I NDH              |                 | 43        | 20      | 2.5        | 3E-04 |
| └ Complex II                 |                 | 8         | 4       | 2.6        |       |
| └ Complex III                |                 | 14        | 3       | 1.1        |       |
| └ Mito. envelope             |                 | 186       | 51      | 1.4        | 2E-02 |
| Vacuole                      |                 | 600       | 174     | 1.5        | 1E-08 |
| Endoplasmic reticulum        |                 | 381       | 101     | 1.4        | 1E-03 |
| H+ ATPase, V-type            |                 | 11        | 9       | 4.3        | 1E-04 |
| <b>Biological Process</b>    |                 |           |         |            |       |
| Translation                  |                 | 426       | 152     | 1.9        | 7E-13 |
| Carbohydrate catabolism      |                 | 516       | 147     | 1.5        | 1E-05 |
| └ Glucose                    |                 | 451       | 141     | 1.6        | 7E-08 |
| └ Pentose-P shunt            |                 | 195       | 60      | 1.6        | 3E-02 |
| Phospholipid biosynthesis    |                 | 354       | 103     | 1.5        | 3E-04 |
| Photorespiration             |                 | 149       | 52      | 1.8        | 4E-02 |
| Phosphatidylinositol bios.   |                 | 90        | 46      | 2.7        | 5E-09 |
| RNA methylation              |                 | 165       | 64      | 2.0        | 6E-07 |
| Divalent metal ion transport |                 | 175       | 61      | 1.8        | 7E-05 |
| Cysteine biosynthesis        |                 | 202       | 64      | 1.6        | 1E-03 |
| Vesicle mediated transport   |                 | 461       | 125     | 1.4        | 1E-03 |
| α-amino acid biosynthesis    |                 | 386       | 95      | 1.3        | 9E-02 |

| 12 pm ZT 6                   |  | Annotated | Present | Enrichment   | FDR   |
|------------------------------|--|-----------|---------|--------------|-------|
| Cellular Component           |  |           |         |              |       |
| Chloroplast                  |  | 2494      | 349     | 1.8          | 4E-30 |
| └ Stroma                     |  | 558       | 118     | 2.7          | 4E-22 |
| └ Nucleoid                   |  | 31        | 11      | 4.5          | 2E-04 |
| └ Plastid envelope           |  | 495       | 89      | 2.3          | 3E-12 |
| └ Thylakoid                  |  | 407       | 70      | 2.2          | 1E-08 |
| └ Membrane                   |  | 271       | 35      | 1.6          | 3E-02 |
| └ Photosystem                |  | 42        | 3       | not enriched |       |
| └ Lumen                      |  | 77        | 15      | 2.4          | 1E-02 |
| Signal recognition particle  |  | 9         | 6       | 8.3          | 3E-04 |
| Nuclear chromatin            |  | 15        | 4       | 3.4          |       |
| Proteasome complex           |  | 44        | 10      | 2.9          | 2E-02 |
| <b>Biological process</b>    |  |           |         |              |       |
| Carboxylic acid metab.       |  | 1425      | 185     | 1.6          | 1E-09 |
| Ribonucleotide metabolism    |  | 249       | 39      | 1.9          | 1E-03 |
| Amino acid metabolism        |  | 694       | 107     | 1.9          | 4E-09 |
| └ α-amino acid biosynth.     |  | 386       | 52      | 1.7          | 3E-03 |
| └ Aromatic                   |  | 86        | 23      | 3.3          | 1E-05 |
| └ Arginine                   |  | 9         | 3       | 4.1          |       |
| └ Serine family              |  | 208       | 29      | 1.7          | 3E-02 |
| └ Valine, (Iso)leucine       |  | 14        | 5       | 4.4          | 4E-02 |
| └ Aspartate family           |  | 111       | 13      | 1.5          |       |
| └ Thr metabolism             |  | 14        | 7       | 6.2          | 1E-03 |
| └ Glutamine family           |  | 20        | 3       | 1.9          |       |
| └ Lysine                     |  | 7         | 1       | 1.8          |       |
| └ Proline                    |  | 5         | 1       | 2.5          |       |
| └ Histidine                  |  | 8         | 1       | 1.6          |       |
| rRNA processing              |  | 247       | 48      | 2.4          | 7E-07 |
| tRNA metabolic process       |  | 108       | 34      | 3.9          | 8E-10 |
| └ tRNA aminoacylation        |  | 39        | 12      | 3.8          | 8E-04 |
| S-compound metabolism        |  | 499       | 72      | 1.8          | 3E-05 |
| └ Fe-S cluster assembly      |  | 95        | 23      | 3.0          | 4E-05 |
| └ Glucosinolate metab.       |  | 173       | 32      | 2.3          | 2E-04 |
| └ Cysteine biosynthesis      |  | 202       | 27      | 1.7          | 6E-02 |
| Protein targeting to plastid |  | 61        | 12      | 2.4          | 4E-02 |
| Photosystem II assembly      |  | 146       | 28      | 2.4          | 3E-04 |
| Isoprenoid biosynthesis      |  | 351       | 62      | 2.2          | 3E-07 |
| └ Carotenoids                |  | 103       | 25      | 3.0          | 2E-05 |

Translation peak – CCA1-ox

| 6 pm ZT 12                 |  | Annotated | Present      | Enrichment   | FDR   |
|----------------------------|--|-----------|--------------|--------------|-------|
| Cellular Component         |  |           |              |              |       |
| Chloroplast                |  | 2494      | 298          | 1.2          | 3E-03 |
| └ Stroma                   |  | 558       | 73           | 1.4          |       |
| └ Ribosome                 |  | 5         | 0            |              |       |
| └ Thylakoid                |  | 407       | not enriched |              |       |
| Chromosome                 |  | 125       | 21           | 1.7          |       |
| └ Chromatin                |  | 65        | 12           | 1.9          |       |
| <b>Molecular Function</b>  |  |           |              |              |       |
| Metalloendopeptidase       |  | 38        | 17           | 4.6          | 4E-06 |
| ATP binding                |  | 1089      | 157          | 1.5          | 1E-05 |
| <b>Biological Process</b>  |  |           |              |              |       |
| Plastid organization       |  | 375       | 74           | 2.0          | 3E-06 |
| └ Localization             |  | 103       | 23           | 2.3          | 5E-03 |
| Photosynthesis             |  | 318       | 39           | not enriched |       |
| Carbohydrate biosynthesis  |  | 676       | 89           | 1.3          | 3E-02 |
| └ Polysaccharide           |  | 455       | 68           | 1.5          | 8E-03 |
| └ Starch                   |  | 179       | 30           | 1.7          | 3E-02 |
| Cell cycle                 |  | 552       | 82           | 1.5          | 3E-03 |
| └ Cell division            |  | 393       | 63           | 1.6          | 3E-03 |
| └ Cytokinesis              |  | 178       | 42           | 2.4          | 1E-05 |
| Microtubule process        |  | 241       | 51           | 2.2          | 2E-05 |
| Carotenoid biosynthesis    |  | 103       | 21           | 2.1          | 2E-02 |
| tRNA aminoacylation        |  | 39        | 9            | 2.4          |       |
| Histone lysine methylation |  | 178       | 34           | 2.0          | 5E-03 |
| └ H3-K9                    |  | 136       | 29           | 2.2          | 2E-03 |
| └ H3-K4                    |  | 8         | 3            | 3.8          |       |

| 12 am ZT 18               |  | Annotated | Present | Enrichment | FDR   |
|---------------------------|--|-----------|---------|------------|-------|
| Cellular Component        |  |           |         |            |       |
| Nucleus                   |  | 4451      | 402     | 1.2        | 3E-04 |
| <b>Molecular Function</b> |  |           |         |            |       |
| ATP binding               |  | 1089      | 140     | 1.8        | 5E-10 |
| └ Protein kinase          |  | 577       | 82      | 2.0        | 7E-08 |
| └ Helicase                |  | 99        | 16      | 2.2        | 4E-02 |
| <b>Biological Process</b> |  |           |         |            |       |
| mRNA catabolism           |  | 98        | 20      | 2.7        | 6E-03 |
| Gene silencing by RNA     |  | 236       | 33      | 1.9        | 4E-02 |
| Chromatin silencing       |  | 185       | 26      | 1.9        | 6E-02 |
| Protein phosphorylation   |  | 668       | 86      | 1.7        | 2E-04 |
| Protein glycosylation     |  | 193       | 31      | 2.1        | 6E-03 |
| N compound catabolism     |  | 315       | 32      | 1.4        |       |
| Actin nucleation          |  | 75        | 14      | 2.5        | 6E-02 |
| Cell cycle                |  | 552       | 63      | 1.5        | 4E-02 |
| Gravitropism              |  | 129       | 35      | 3.6        | 2E-08 |

Supplemental Figure 10. Gene ontology analysis of diurnal changes in translation state in CCA1-ox. Translation states of nuclear-encoded genes were classified according to the time of peak TL. Genes were filtered for a significant TL cycle by selecting with SAM (Tusher, 2001) at an FDR of <0.1, or ANOVA with p<0.05 or Delta TL>0.7. Genes with TL peaks were distributed as follows: peak at 6am: 2140 genes; 12pm: 899; 6pm:1112; 12am: 842. GO analysis was performed with TOPGO, using all 10,942 reliably expressed genes as a background set. FDR values below 1E-10 are colored dark green, those between 1E-10 and 1E-05 are colored medium green, and those between 1E-05 and 5E-02 are light green. Abbreviations: PS, photosystem; NDH, NADH dehydrogenase; P, phosphate; snRNP, small nucleolar ribonucleoprotein particle, H3-K, histone 3-lysine.

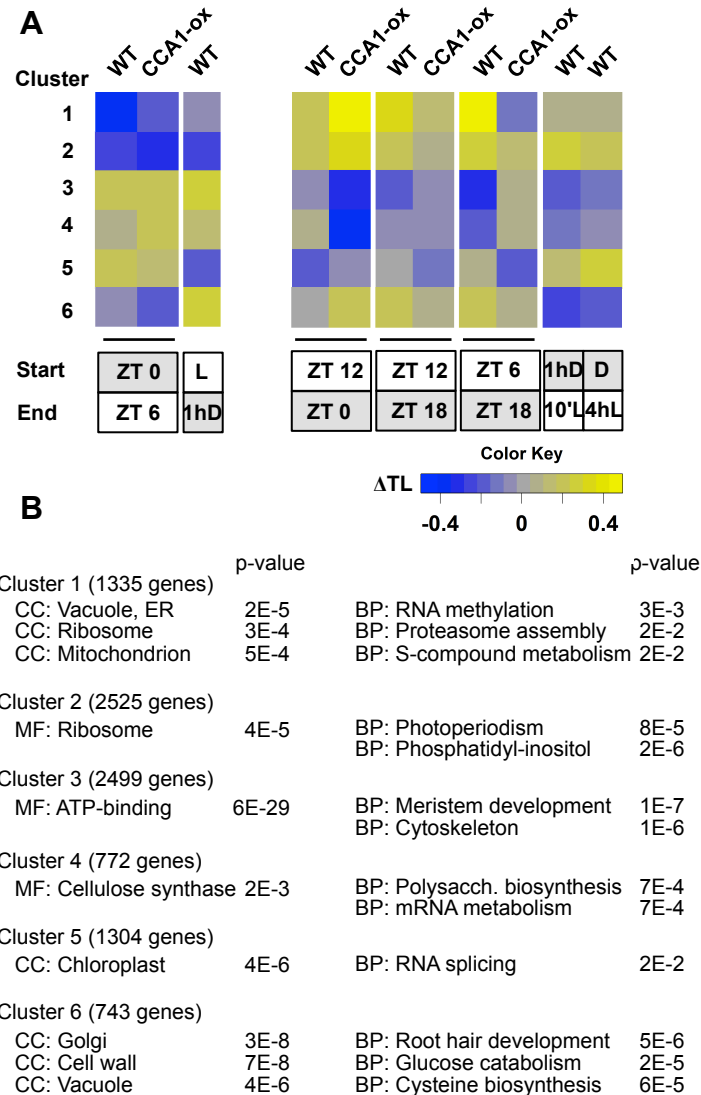

Supplemental Figure 11. The diel translation responses to light-dark changes are only partially correlated with responses to short-term light-dark shifts. Data from wild type and CCA1-ox were co-clustered together with mRNAs known to be regulated by a 1 hour exposure to darkness (L-> 1hD), followed by reillumination for 10 minutes (1hD->10'L; Juntawong et al., 2012), as well as with mRNAs known to be translationally regulated when dark-grown, etiolated, seedlings are exposed to four hours of light (D->4hL; Liu et al., 2012). Public microarray data sets GSE34231 and GSE29657 were obtained from the Gene Expression Omnibus (GEO) repository at <http://www.ncbi.nlm.nih.gov/geo/>. Raw data were processed as described above, and probes with marginal ("M") or present ("P") expression signals in all polysome and total RNA fractions within each data set were retained, resulting in 9,178 probes of sufficient quality in common among the two public data sets and our own. TL was calculated for each probe in the public data as TL = polysomal/total RNA, and TL in our data was calculated as described earlier.  $\Delta TL$  values were calculated for eleven comparisons between experimental conditions as the difference in mean TL. Hierarchical clustering of the genes on the basis of their  $\Delta TL$  across the eleven comparisons was performed, using the Pearson coefficient as the similarity metric. The resulting cluster tree was cut into six clusters, and within each cluster, the  $\Delta TL$  values were averaged over all genes. (A) displays the eleven mean  $\Delta TL$  values for each cluster (yellow=translational stimulation). Treatments are indicated at the bottom where gray shading stands for dark condition (e.g. ZT18) and no shading stands for light condition (e.g. ZT6). (B) GO enrichment analysis was performed on the genes in each cluster using *topGo*. Key enriched terms are shown along with the false discovery corrected p-value. BP, biological process, MF, molecular function, CC, cellular compartment.



**Supplemental Table 1. Oligonucleotides**

| <b>Oligonucleotide</b> | <b>AGI Number</b> | <b>Sequence 5' to 3'</b>   |
|------------------------|-------------------|----------------------------|
| RPL26B F               | AT5G67510         | GTTCTCATGAGCTCGCCGTT       |
| RPL26B R               | AT5G67510         | GAACGTCCCACGAACAACCTT      |
| LHCA1 F                | AT3G54890         | CAGCTTACCTTGACGGTTCTG      |
| LHCA1 R                | AT3G54890         | GAGCTCTGACTCTTTGTATCTCTCAA |
| GIGANTEA F             | AT1G22770         | GCAACAATACGGTGCCTTTC       |
| GIGANTEA R             | AT1G22770         | TGGGTATGGAGCTTTGGTTC       |
| EF1A F                 | AT5G60390         | TCTCCGAGTACCCACCTTTG       |
| EF1A R                 | AT5G60390         | CTCCAGTTGGGTCCTTCTTG       |
| CCA1 F                 | AT2G46830         | CGGGTGTGAATGATGGAAAAGA     |
| CCA1 R                 | AT2G46830         | CGATCTTCATTGGCCATCTCAG     |
| CAB4 F                 | AT3G47470         | AGAGCTAGCAAACGGGAGGT       |
| CAB4 R                 | AT3G47470         | TCAGACAAGTGCTGCAACAGA      |
| LHY F                  | AT1G01060         | GACAACGCGGTTCAAGATG        |
| LHY R                  | AT1G01060         | TGCCAAGGGTAGTTTTGCAT       |
| MCM3 F                 | AT5G46280         | CAACAACAATGGGGTTGGAG       |
| MCM3 R                 | AT5G46280         | GCCATCGCTGATCATCACTT       |
| PRR3 F                 | AT5G60100         | TGACAAGAAGTCGGTGAAACC      |
| PRR3 R                 | AT5G60100         | CCACCACTACTCCCACTTTCA      |

**Supplemental Table 2. Arabidopsis Genome Identifiers (AGI) of selected genes.**

| <b>Gene</b> | <b>AGI Number</b> |
|-------------|-------------------|
| CAB4        | AT3G47470         |
| CCA1        | AT2G46830         |
| COP1        | AT2G32950         |
| CRY1        | AT4G08920         |
| CRY2        | AT1G04400         |
| EF1A        | AT5G60390         |
| ELF3        | AT2G25930         |
| ELF4        | AT2G40080         |
| GI          | AT1G22770         |
| GRP7/CCR2   | AT1G06820         |
| GRP8/CCR1   | AT4G39260         |
| HY5         | AT5G11260         |
| HYH         | AT3G17609         |
| LHCA1       | AT3G54890         |
| LHCB3       | AT5G54270         |
| LHY         | AT1G01060         |
| LTP1        | AT2G38540         |
| LUX         | AT3G46640         |
| MCM3        | AT5G46280         |
| MRPL11      | AT4G35490         |
| PEPC1       | AT1G17710         |
| PHYA        | AT1G09570         |
| PHYB        | AT2G18790         |
| PHYC        | AT5G35840         |
| PHYD        | AT4G16250         |
| PHYE        | AT4G18130         |
| PHOT1       | AT3G45780         |
| PHOT2       | AT5G58140         |
| PIF1        | AT2G20180         |
| PIF3        | AT1G09530         |
| PIF4        | AT2G43010         |
| PGR5        | AT2G05620         |
| PRR3        | AT5G60100         |
| PRR5        | AT5G24470         |
| PRR7        | AT5G02810         |
| PRR9        | AT2G46670         |
| RCE1        | AT4G36800         |
| RPL26B      | AT5G67510         |
| RVE8        | AT3G09600         |
| SRR1        | AT5G59560         |
| TOC1        | AT5G61380         |
| UVR8        | AT5G63860         |
| ZTL         | AT5G57360         |

Supplemental Data. Missra et al. (2015). *Plant Cell*. 10.1105/tpc.15.00546.

### **Supplemental References**

Thimm, O., Blaesing, O., Gibon, Y., Nagel, A., Meyer, S., Krüger, P., Selbig, J., Müller, L.A., Rhee, S.Y. and Stitt, M. (2004). MAPMAN: a user-driven tool to display genomics data sets onto diagrams of metabolic pathways and other biological processes. *Plant J* **37**: 914-39.

Browning, K.S. and Bailey-Serres, J. (2015). Mechanism of cytoplasmic mRNA translation. *The Arabidopsis Book* **13**:e0176.
